# Supplementary material
Source: ML conference proceedings conference paper supplement (https://proceedings.mlr.press/v80/ilse18a.html)
Supplement: Supplementary file 1 [file ilse18a-supp.pdf]

## 6. Appendix

### 6.1. Deep MIL approaches

In Figure 6 we present three deep MIL approaches discussed in the paper.

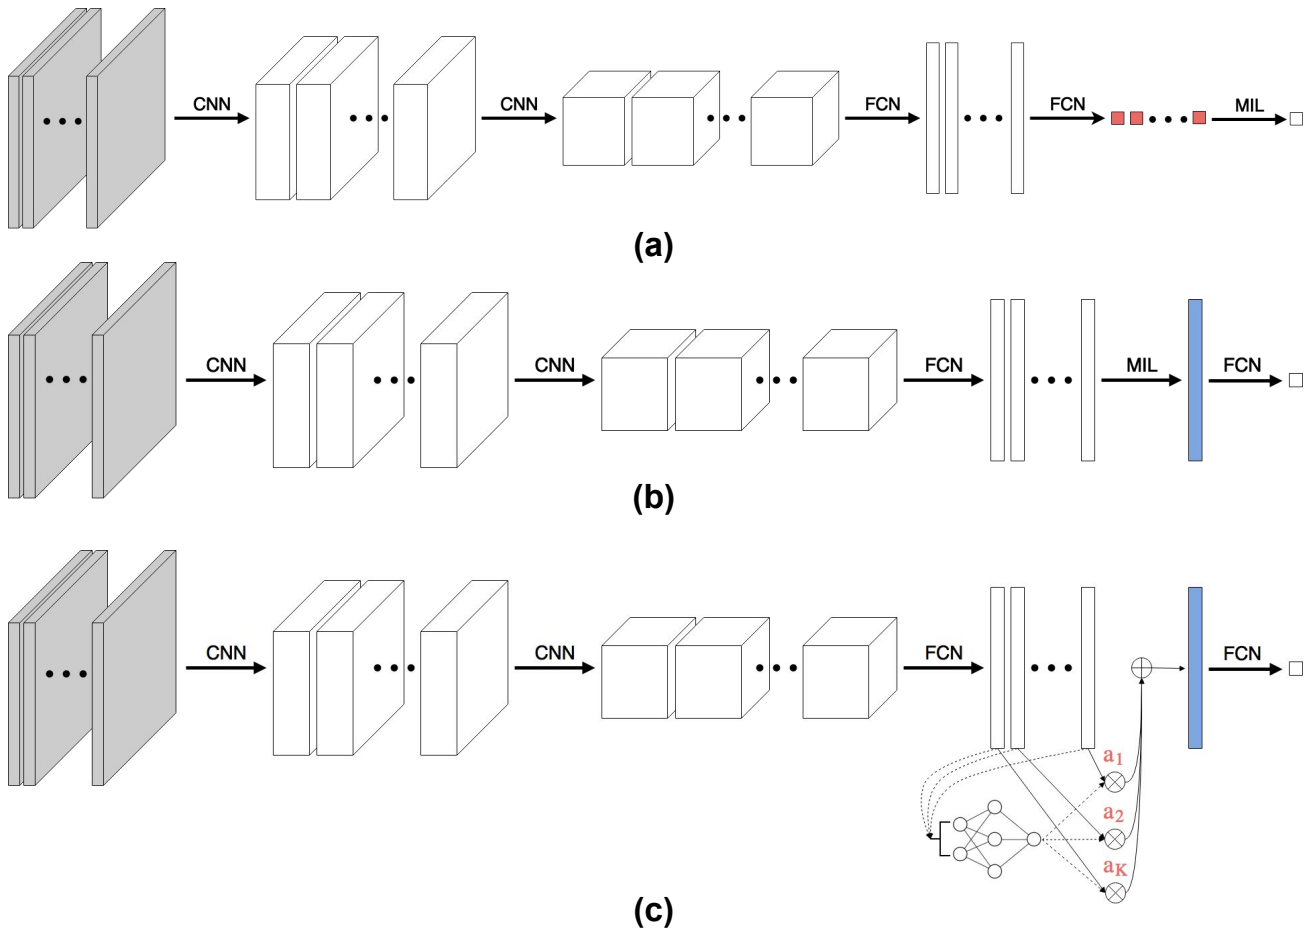

Figure 6. Deep MIL approaches: (a) the instance-based approach, (b) the embedding-based approach, (c) the proposed approach with the attention mechanism as the MIL pooling. Red color corresponds to instance scores, blue color depicts a bag vector representation. *Best viewed in color.*

### 6.2. Code

The implementation of our methods is available online at <https://github.com/AMLab-Amsterdam/AttentionDeepMIL>. All experiments were run on NVIDIA TITAN X Pascal with a batch size of 1 (= 1 bag) for all datasets.

### 6.3. Classical MIL datasets

**Additional details** In Table 1 a general description of the five benchmark MIL datasets used in the experiments is given. In Tables 5 and 6 we present architectures of the embedding-based and the instance-based models, respectively. We denote a fully-connected layer by 'fc' and the number of output hidden units is provided after a dash. The ReLU non-linearity was used. In Table 7 the details of the optimization (learning) procedure are given. We provide values of hyperparameters determined by the model selection procedure for which the highest validation performance was achieved.

Table 4. Overview of classical MIL datasets.

| Dataset  | # of bags | # of instances | # of features |
|----------|-----------|----------------|---------------|
| Musk1    | 92        | 476            | 166           |
| Musk2    | 102       | 6598           | 166           |
| Tiger    | 200       | 1220           | 230           |
| Fox      | 200       | 1302           | 230           |
| Elephant | 200       | 1391           | 230           |

Table 5. Classical MIL datasets: The embedding-based model architecture (Wang et al., 2016).

| Layer | Type                              |
|-------|-----------------------------------|
| 1     | fc-256 + ReLU                     |
| 2     | dropout                           |
| 3     | fc-128 + ReLU                     |
| 4     | dropout                           |
| 5     | fc-64 + ReLU                      |
| 6     | dropout                           |
| 7     | mil-max/mil-mean/mil-attention-64 |
| 8     | fc-1 + sigm                       |

Table 6. Classical MIL datasets: The instance-based model architecture (Wang et al., 2016).

| Layer | Type             |
|-------|------------------|
| 1     | fc-256 + ReLU    |
| 2     | dropout          |
| 3     | fc-128 + ReLU    |
| 4     | dropout          |
| 5     | fc-64 + ReLU     |
| 6     | dropout          |
| 7     | fc-1 + sigm      |
| 8     | mil-max/mil-mean |

Table 7. Classical MIL datasets: The optimization procedure details (Wang et al., 2016).

| Experiment | Optimizer | Momentum | Learning rate | Weight decay | Epochs | Stopping criteria                |
|------------|-----------|----------|---------------|--------------|--------|----------------------------------|
| Musk1      | SGD       | 0.9      | 0.0005        | 0.005        | 100    | lowest validation error and loss |
| Musk2      | SGD       | 0.9      | 0.0005        | 0.03         | 100    | lowest validation error and loss |
| Tiger      | SGD       | 0.9      | 0.0001        | 0.01         | 100    | lowest validation error and loss |
| Fox        | SGD       | 0.9      | 0.0005        | 0.005        | 100    | lowest validation error and loss |
| Elephant   | SGD       | 0.9      | 0.0001        | 0.005        | 100    | lowest validation error and loss |

### 6.4. MNIST-bags

**Additional details** In Tables 8 and 9 we present architectures of the embedding-based and the instance-based models for MNIST-BAGS, respectively. We denote a convolutional layer by 'conv', in brackets we provide kernel size, stride and padding, and the number of kernels is provided after a dash. The convolutional max-pooling layer is denoted by 'maxpool' and the pooling size is given in brackets. The ReLU non-linearity was used. In Table 10 the details of the optimization (learning) procedure for deep MIL approach are given. The details of the SVM are given in Table 11. We provide values of hyperparameters determined by the model selection procedure for which the highest validation performance was achieved.

Table 8. MNIST-bags: The embedding-based model architecture (Le-Cun et al., 1998).

| Layer | Type                               |
|-------|------------------------------------|
| 1     | conv(5,1,0)-20 + ReLU              |
| 2     | maxpool(2,2)                       |
| 3     | conv(5,1,0)-50 + ReLU              |
| 4     | maxpool(2,2)                       |
| 5     | fc-500 + ReLU                      |
| 6     | mil-max/mil-mean/mil-attention-128 |
| 7     | fc-1 + sigm                        |

Table 9. MNIST-bags: The instance-based model architecture (Le-Cun et al., 1998).

| Layer | Type                  |
|-------|-----------------------|
| 1     | conv(5,1,0)-20 + ReLU |
| 2     | maxpool(2,2)          |
| 3     | conv(5,1,0)-50 + ReLU |
| 4     | maxpool(2,2)          |
| 5     | fc-500 + ReLU         |
| 6     | fc-1 + sigm           |
| 7     | mil-max/mil-mean      |

Table 10. MNIST-bags: The optimization procedure details.

| Experiment | Optimizer | $\beta_1, \beta_2$ | Learning rate | Weight decay | Epochs | Stopping criteria            |
|------------|-----------|--------------------|---------------|--------------|--------|------------------------------|
| All        | Adam      | 0.9, 0.999         | 0.0005        | 0.0001       | 200    | lowest validation error+loss |

Table 11. MNIST-bags: SVM configuration.

| Model  | Features         | Kernel | $C$ | $\gamma$ | Max iterations |
|--------|------------------|--------|-----|----------|----------------|
| MI-SVM | Raw pixel values | RBF    | 5   | 0.0005   | 200            |

**Additional results** In Tables 12, 13 and 14 we present the test AUC value for 10, 50 and 100 instances on average per a bag, respectively.

In Figure 7 a negative bag is presented. In Figure 8 a positive bag with a single '9' is given. In Figure 9 a positive bag with multiple '9's is presented. In all figures attention weights are provided and in the case of positive bags a red rectangle highlights positive instances.

Table 12. The test AUC for MNIST-BAGS with on average 10 instances per bag for different numbers of training bags.

| # of training bags | 50            | 100           | 150           | 200           | 300           | 400           | 500           |
|--------------------|---------------|---------------|---------------|---------------|---------------|---------------|---------------|
| Instance+max       | 0.553 ± 0.053 | 0.745 ± 0.100 | 0.960 ± 0.004 | 0.979 ± 0.001 | 0.984 ± 0.001 | 0.986 ± 0.001 | 0.986 ± 0.001 |
| Instance+mean      | 0.663 ± 0.014 | 0.676 ± 0.012 | 0.694 ± 0.010 | 0.694 ± 0.017 | 0.709 ± 0.020 | 0.693 ± 0.023 | 0.712 ± 0.018 |
| MI-SVM             | 0.697 ± 0.054 | 0.851 ± 0.009 | 0.862 ± 0.008 | 0.898 ± 0.014 | 0.926 ± 0.004 | 0.942 ± 0.002 | 0.948 ± 0.002 |
| Embedded+max       | 0.713 ± 0.016 | 0.914 ± 0.011 | 0.954 ± 0.005 | 0.968 ± 0.001 | 0.980 ± 0.001 | 0.981 ± 0.003 | 0.986 ± 0.002 |
| Embedded+mean      | 0.695 ± 0.026 | 0.841 ± 0.027 | 0.926 ± 0.004 | 0.953 ± 0.004 | 0.974 ± 0.002 | 0.980 ± 0.001 | 0.984 ± 0.002 |
| Attention          | 0.768 ± 0.054 | 0.948 ± 0.007 | 0.949 ± 0.006 | 0.970 ± 0.003 | 0.980 ± 0.000 | 0.982 ± 0.001 | 0.986 ± 0.001 |
| Gated Attention    | 0.753 ± 0.054 | 0.916 ± 0.013 | 0.955 ± 0.003 | 0.974 ± 0.002 | 0.980 ± 0.004 | 0.983 ± 0.002 | 0.987 ± 0.001 |

Table 13. The test AUC for MNIST-BAGS with on average 50 instances per bag for different numbers of training bags.

| # of training bags | 50            | 100           | 150           | 200           | 300           | 400           | 500           |
|--------------------|---------------|---------------|---------------|---------------|---------------|---------------|---------------|
| Instance+max       | 0.576 ± 0.059 | 0.715 ± 0.096 | 0.937 ± 0.045 | 0.992 ± 0.002 | 0.994 ± 0.001 | 0.997 ± 0.001 | 0.997 ± 0.001 |
| Instance+mean      | 0.737 ± 0.014 | 0.744 ± 0.029 | 0.824 ± 0.012 | 0.813 ± 0.030 | 0.722 ± 0.021 | 0.728 ± 0.017 | 0.798 ± 0.011 |
| MI-SVM             | 0.824 ± 0.067 | 0.946 ± 0.004 | 0.959 ± 0.002 | 0.967 ± 0.002 | 0.975 ± 0.001 | 0.976 ± 0.001 | 0.979 ± 0.001 |
| Embedded+max       | 0.872 ± 0.039 | 0.984 ± 0.005 | 0.992 ± 0.001 | 0.996 ± 0.001 | 0.996 ± 0.001 | 0.997 ± 0.001 | 0.997 ± 0.001 |
| Embedded+mean      | 0.841 ± 0.013 | 0.906 ± 0.046 | 0.983 ± 0.005 | 0.992 ± 0.001 | 0.996 ± 0.001 | 0.997 ± 0.001 | 0.997 ± 0.001 |
| Attention          | 0.967 ± 0.010 | 0.982 ± 0.003 | 0.990 ± 0.002 | 0.993 ± 0.002 | 0.989 ± 0.003 | 0.994 ± 0.001 | 0.995 ± 0.001 |
| Gated Attention    | 0.920 ± 0.042 | 0.977 ± 0.006 | 0.993 ± 0.003 | 0.991 ± 0.002 | 0.994 ± 0.002 | 0.995 ± 0.001 | 0.996 ± 0.001 |

Table 14. The test AUC for MNIST-BAGS with on average 100 instances per bag for different numbers of training bags.

| # of training bags | 50            | 100           | 150           | 200           | 300           | 400           | 500           |
|--------------------|---------------|---------------|---------------|---------------|---------------|---------------|---------------|
| Instance+max       | 0.543 ± 0.054 | 0.804 ± 0.107 | 0.899 ± 0.086 | 0.999 ± 0.000 | 1.000 ± 0.000 | 1.000 ± 0.000 | 1.000 ± 0.000 |
| Instance+mean      | 0.842 ± 0.023 | 0.855 ± 0.025 | 0.824 ± 0.014 | 0.896 ± 0.037 | 0.859 ± 0.029 | 0.899 ± 0.012 | 0.868 ± 0.016 |
| MI-SVM             | 0.871 ± 0.060 | 0.991 ± 0.002 | 0.994 ± 0.002 | 0.996 ± 0.001 | 0.997 ± 0.001 | 0.998 ± 0.001 | 0.998 ± 0.001 |
| Embedded+max       | 0.977 ± 0.009 | 0.999 ± 0.001 | 1.000 ± 0.000 | 1.000 ± 0.000 | 1.000 ± 0.000 | 1.000 ± 0.000 | 1.000 ± 0.000 |
| Embedded+mean      | 0.959 ± 0.010 | 0.990 ± 0.003 | 0.998 ± 0.001 | 0.900 ± 0.089 | 1.000 ± 0.000 | 1.000 ± 0.000 | 1.000 ± 0.000 |
| Attention          | 0.996 ± 0.001 | 0.998 ± 0.001 | 0.999 ± 0.000 | 0.998 ± 0.001 | 1.000 ± 0.000 | 1.000 ± 0.000 | 1.000 ± 0.000 |
| Gated Attention    | 0.998 ± 0.001 | 0.999 ± 0.000 | 0.998 ± 0.001 | 0.998 ± 0.001 | 0.999 ± 0.000 | 1.000 ± 0.000 | 1.000 ± 0.000 |

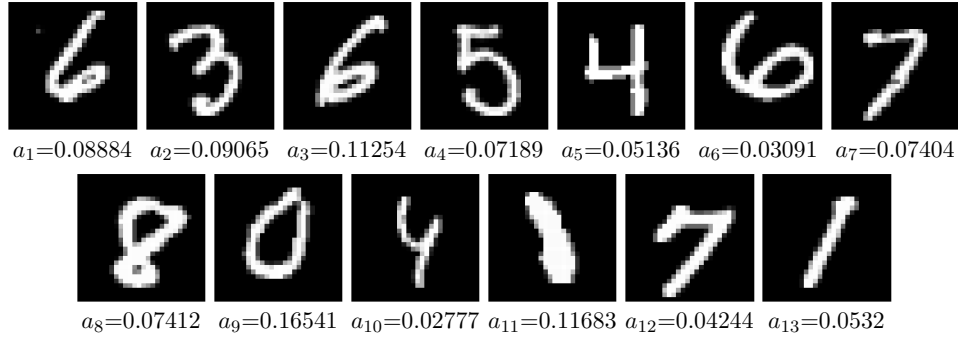

Figure 7. Example of attention weights for a negative bag.

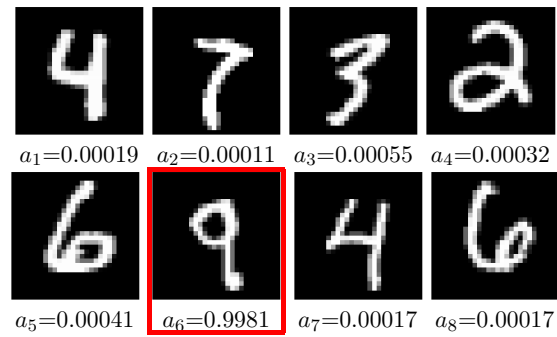

Figure 8. Example of attention weights for a positive bag containing a single '9'.

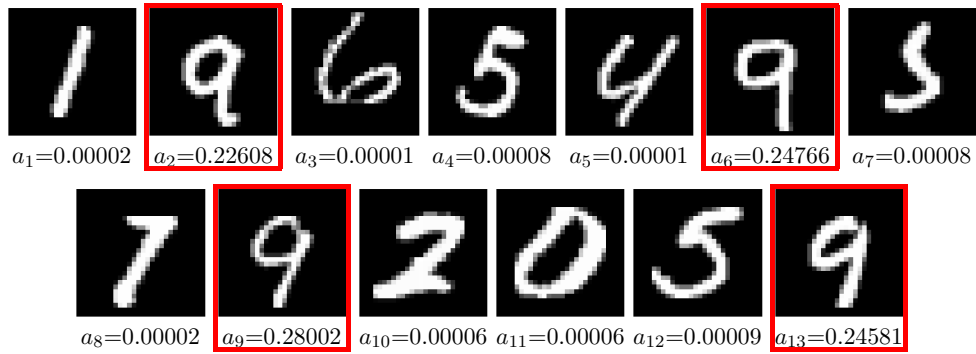

Figure 9. Example of attention weights for a positive bag containing multiple '9's.

## 6.5. Histopathology datasets

**Data augmentation** We randomly adjust the amount of H&E by decomposing the RGB color of the tissue into the H&E color space (Ruifrok & Johnston, 2001), followed by multiplying the magnitude of H&E for a pixel by two i.i.d. Gaussian random variables with expectation equal to one. We randomly rotate and mirror every patch. Lastly, we perform color normalization on every patch.

**Additional details** In Tables 15 and 16 we present architectures of the embedding-based and the instance-based models for histopathology datasets, respectively. In Table 17 the details of the optimization (learning) procedure for deep MIL approach are given. We provide values of hyperparameters determined by the model selection procedure for which the highest validation performance was achieved.

Table 15. Histopathology: The embedding-based model architecture (Sirinukunwattana et al., 2016).

| Layer | Type                               |
|-------|------------------------------------|
| 1     | conv(4,1,0)-36 + ReLU              |
| 2     | maxpool(2,2)                       |
| 3     | conv(3,1,0)-48 + ReLU              |
| 4     | maxpool(2,2)                       |
| 5     | fc-512 + ReLU                      |
| 6     | dropout                            |
| 7     | fc-512 + ReLU                      |
| 8     | dropout                            |
| 9     | mil-max/mil-mean/mil-attention-128 |
| 10    | fc-1 + sigm                        |

Table 16. Histopathology: The instance-based model architecture (Sirinukunwattana et al., 2016).

| Layer | Type                  |
|-------|-----------------------|
| 1     | conv(4,1,0)-36 + ReLU |
| 2     | maxpool(2,2)          |
| 3     | conv(3,1,0)-48 + ReLU |
| 4     | maxpool(2,2)          |
| 5     | fc-512 + ReLU         |
| 6     | dropout               |
| 7     | fc-512 + ReLU         |
| 8     | dropout               |
| 9     | fc-1 + sigm           |
| 10    | mil-max/mil-mean      |

Table 17. Histopathology: The optimization procedure details.

| Experiment | Optimizer | $\beta_1, \beta_2$ | Learning rate | Weight decay | Epochs | Stopping criteria            |
|------------|-----------|--------------------|---------------|--------------|--------|------------------------------|
| All        | Adam      | 0.9, 0.999         | 0.0001        | 0.0005       | 100    | lowest validation error+loss |

**Additional results** In Figures 10, 11 and 12 five images are presented: (a) a full H&E image, (b) all patches containing cells, (c) positive patches, (d) a heatmap given by the attention mechanism, (e) a heatmap given by the Instance+max. We rescaled the attention weights and instance scores using  $a'_k = (a_k - \min(\mathbf{a})) / (\max(\mathbf{a}) - \min(\mathbf{a}))$ .

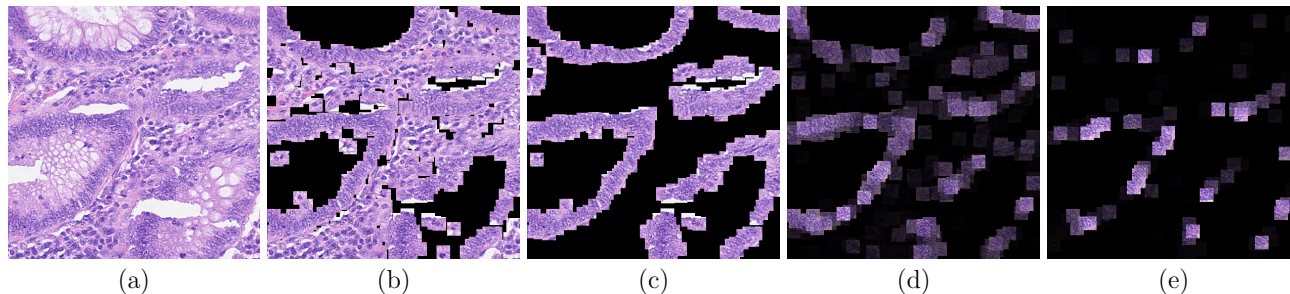

Figure 10. Colon cancer example 1: (a) H&E stained histology image. (b)  $27 \times 27$  patches centered around all marked nuclei. (c) Ground truth: Patches that belong to the class epithelial. (d) Attention heatmap: Every patch from (b) multiplied by its attention weight. (e) Instance+max heatmap: Every patch from (b) multiplied by its score from the INSTANCE+max model. We rescaled the attention weights and instance scores using  $a'_k = (a_k - \min(\mathbf{a})) / (\max(\mathbf{a}) - \min(\mathbf{a}))$ .

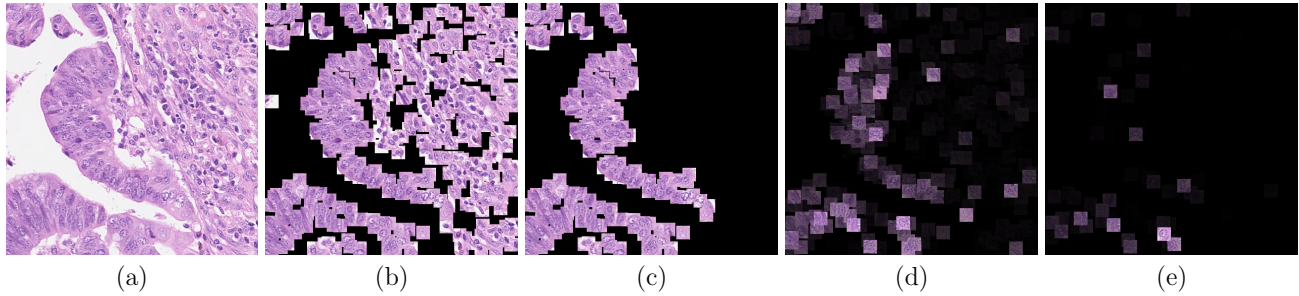

Figure 11. Colon cancer example 2: (a) H&E stained histology image. (b)  $27 \times 27$  patches centered around all marked nuclei. (c) Ground truth: Patches that belong to the class epithelial. (d) Attention heatmap: Every patch from (b) multiplied by its attention weight. (e) Instance+max heatmap: Every patch from (b) multiplied by its score from the INSTANCE+max model. We rescaled the attention weights and instance scores using  $a'_k = (a_k - \min(\mathbf{a})) / (\max(\mathbf{a}) - \min(\mathbf{a}))$ .

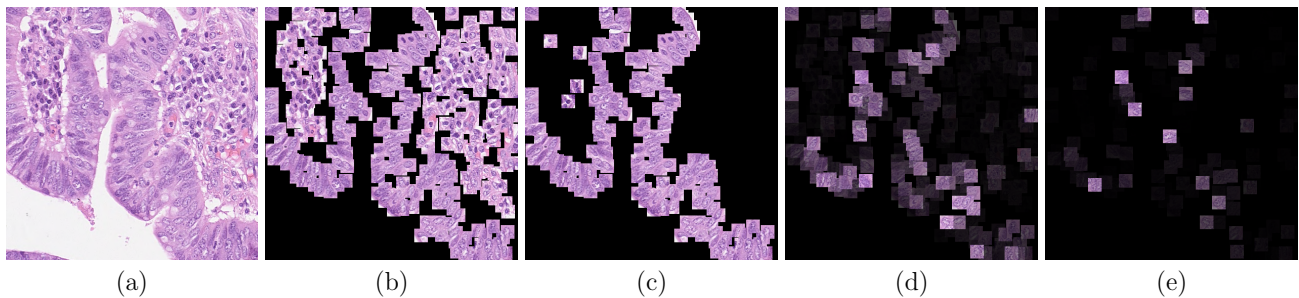

Figure 12. Colon cancer example 3: (a) H&E stained histology image. (b)  $27 \times 27$  patches centered around all marked nuclei. (c) Ground truth: Patches that belong to the class epithelial. (d) Attention heatmap: Every patch from (b) multiplied by its attention weight. (e) Instance+max heatmap: Every patch from (b) multiplied by its score from the INSTANCE+max model. We rescaled the attention weights and instance scores using  $a'_k = (a_k - \min(\mathbf{a})) / (\max(\mathbf{a}) - \min(\mathbf{a}))$ .
